# Supplementary material for: Deletion of the celA gene in Aspergillus nidulans triggers overexpression of secondary metabolite biosynthetic genes
Source: PubMed Central journal article supplement (PMC5519750; doi:10.1038/s41598-017-05920-x), 2017-07-20
Supplement: 41598_2017_5920_MOESM1_ESM.pdf [file 41598_2017_5920_MOESM1_ESM.pdf]

## **Deletion of the *celA* gene in *Aspergillus nidulans* triggers overexpression of secondary metabolite biosynthetic genes**

Gea Guerriero<sup>1,\*</sup>, Lucia Silvestrini<sup>2</sup>, Sylvain Legay<sup>1</sup>, Frank Maixner<sup>3</sup>, Michael Sulyok<sup>4</sup>, Jean-Francois Hausman<sup>1</sup>, Joseph Strauss<sup>2,\*</sup>

<sup>1</sup>Luxembourg Institute of Science and Technology (LIST), Environmental Research and Innovation (ERIN) Department, Esch/Alzette, L-4362, Luxembourg.

<sup>2</sup>University of Natural Resources and Life Sciences Vienna (BOKU), Department of Applied Genetics and Cell Biology, Fungal Genetics and Genomics Unit, BOKU Campus Tulln/Donau, A-3430, Austria.

<sup>3</sup>European Academy of Bozen/Bolzano (EURAC), Institute for Mummies and the Iceman, Bolzano, 39100, Italy.

<sup>4</sup>University of Natural Resources and Life Sciences Vienna (BOKU), Department for Agrobiotechnology (IFA-Tulln), A-3430 Tulln, Austria.

\*[gea.guerriero@list.lu](mailto:gea.guerriero@list.lu); [joseph.strauss@boku.ac.at](mailto:joseph.strauss@boku.ac.at)

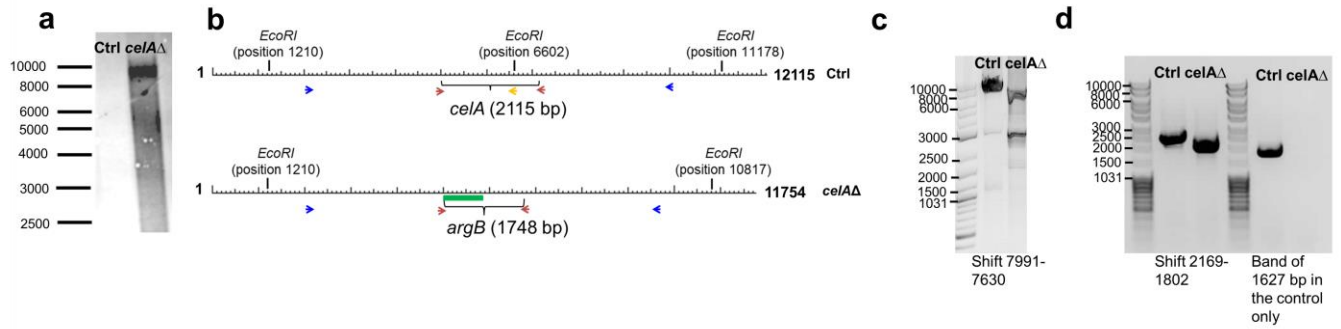

**Supplementary Figure 1.** Molecular validation of *celAΔ*. a) Southern blotting (band size 9607 bp). b) *EcoRI* restriction map of the *celA* genomic region (+/- 5 kbps) with details of *celA* nested Fwd and *celA* nested Rev (in blue), *celA* diagnostic Fwd and *celA* diagnostic Rev (in red) and *celA* specific Rev (in yellow). The probe (815 bp) used for the Southern blotting (amplified with the primer pair *argchimera* Fwd and *arg* Southern Rev, Suppl. Information) is indicated in green. c) PCR on the control and *celAΔ* strain using primers *celA* nested Fwd and *celA* nested Rev. d) PCRs on the control and *celAΔ* strain using primers *celA* diagnostic Fwd and *celA* diagnostic Rev and *celA* diagnostic Fwd and *celA* specific Rev.
